# Supplementary material for: Perinatal outcomes of neonates born from different endometrial preparation protocols after frozen embryo transfer: a retrospective cohort study
Source: Springer Nature journal article supplement (doi:10.1186/s12884-021-03791-9), 2021-04-29
Supplement: MOESM1 [file 19118278]

## Supplementary Materials

### **Perinatal outcomes of neonates born from different endometrial preparation protocols after frozen embryo transfer: a retrospective cohort study**

Short title: endometrial preparation and perinatal outcomes

Cheng Li<sup>1,2,†</sup>, Yi-Chen He<sup>1,2,†</sup>, Jing-Jing Xu<sup>1,2,†</sup>, Yu Wang<sup>1,2</sup>, Han Liu<sup>1,2</sup>, Chen-Chi Duan<sup>1,2</sup>, Chao-Yi Shi<sup>1,2</sup>, Lei Chen<sup>1,2</sup>, Jie Wang<sup>1,2</sup>, Jian-Zhong Sheng<sup>3</sup>, He-Feng Huang<sup>1,2,4\*</sup>, Yan-Ting Wu<sup>1,2,4\*</sup>

<sup>1</sup> International Peace Maternity and Child Health Hospital, School of Medicine, Shanghai Jiao Tong University, Shanghai, 200030, China

<sup>2</sup> Shanghai Key Laboratory of Embryo Original Diseases, Shanghai, 200030, China

<sup>3</sup> Department of Pathology and Pathophysiology, School of Medicine, Zhejiang University, Hangzhou, Zhejiang, China

<sup>4</sup> Obstetrics and Gynecology Hospital, Fudan University, Shanghai, China

† Cheng Li, Yi-Chen He, and Jing-Jing Xu contributed equally to this work.

\* Correspondence: He-Feng Huang & Yan-Ting Wu, International Peace Maternity and Child Health Hospital, School of Medicine, Shanghai Jiao Tong University, No. 910, Hengshan Rd., Shanghai 200030, China. Obstetrics and Gynecology Hospital, Fudan University, No.419, Fangxie Rd., Shanghai 200000, China

E-mail: [yanting\\_wu@163.com](mailto:yanting_wu@163.com) & [huanghefg@sjtu.edu.cn](mailto:huanghefg@sjtu.edu.cn).

**Table S1 Pregnancy-related complications of singleton deliveries following FET with different endometrial preparation protocols stratified according to the number of embryo transfer**

|                                                | Single embryo transfer |             |             |                          |                          | Multiple embryo transfer |             |             |                          |                          |
|------------------------------------------------|------------------------|-------------|-------------|--------------------------|--------------------------|--------------------------|-------------|-------------|--------------------------|--------------------------|
|                                                | NC                     | OS          | HRT         | aOR (95%CI) <sup>a</sup> | aOR (95%CI) <sup>a</sup> | NC                       | OS          | HRT         | aOR (95%CI) <sup>a</sup> | aOR (95%CI) <sup>a</sup> |
|                                                | (N=211)                | (N=32)      | (N=180)     |                          |                          | (N=1280)                 | (N=240)     | (N=1054)    |                          |                          |
|                                                | No. (%)                | No. (%)     | No. (%)     | OS vs.NC                 | HRT vs. NC               | No. (%)                  | No. (%)     | No. (%)     | OS vs.NC                 | HRT vs. NC               |
| <b>Gestational diabetes mellitus</b>           |                        |             |             |                          |                          |                          |             |             |                          |                          |
| No                                             | 194 (91.94)            | 28 (87.50)  | 163 (90.56) | Reference                | Reference                | 1157 (90.39)             | 209 (87.08) | 947 (89.85) | Reference                | Reference                |
| Yes                                            | 17 (8.06)              | 4 (12.50)   | 17 (9.44)   | 2.02 (0.59-6.90)         | 1.49 (0.71-3.15)         | 123 (9.61)               | 31 (12.92)  | 107 (10.15) | 1.41 (0.92-2.16)         | 1.04 (0.78-1.38)         |
| <b>Hypertensive disorder</b>                   |                        |             |             |                          |                          |                          |             |             |                          |                          |
| No                                             | 190 (90.05)            | 30 (93.75)  | 155 (86.11) | Reference                | Reference                | 1111 (86.80)             | 186 (77.50) | 843 (79.98) | Reference                | Reference                |
| Gestational hypertension                       | 9 (4.27)               | 0 (0.00)    | 13 (7.22)   | NA                       | 1.77 (0.71-4.44)         | 82 (6.41)                | 20 (8.33)   | 77 (7.31)   | 1.48 (0.88-2.49)         | 1.26 (0.90-1.76)         |
| Preeclampsia                                   | 12 (5.69)              | 2 (6.25)    | 12 (6.67)   | 1.20 (0.25-5.79)         | 1.32 (0.56-3.10)         | 87 (6.80)                | 34 (14.17)  | 134 (12.71) | 2.37 (1.54-3.65)         | 1.99 (1.48-2.67)         |
| <b>Intrahepatic cholestasis of pregnancy</b>   |                        |             |             |                          |                          |                          |             |             |                          |                          |
| No                                             | 204 (96.68)            | 32 (100.00) | 173 (96.11) | Reference                | Reference                | 1229 (96.02)             | 221 (92.08) | 979 (92.88) | Reference                | Reference                |
| Yes                                            | 7 (3.32)               | 0 (0.00)    | 7 (3.89)    | NA                       | 1.24 (0.40-3.85)         | 51 (3.98)                | 19 (7.92)   | 75 (7.12)   | 2.35 (1.35-4.10)         | 1.94 (1.33-2.84)         |
| <b>Meconium staining of the amniotic fluid</b> |                        |             |             |                          |                          |                          |             |             |                          |                          |
| No                                             | 175 (82.94)            | 26 (81.25)  | 150 (83.33) | Reference                | Reference                | 1099 (85.86)             | 199 (82.92) | 862 (81.78) | Reference                | Reference                |
| Yes                                            | 36 (17.06)             | 6 (18.75)   | 30 (16.67)  | 1.30 (0.49-3.48)         | 0.97 (0.56-1.69)         | 181 (14.14)              | 41 (17.08)  | 192 (18.22) | 1.29 (0.89-1.88)         | 1.38 (1.10-1.74)         |
| <b>Preterm birth</b>                           |                        |             |             |                          |                          |                          |             |             |                          |                          |
| No                                             | 199 (94.31)            | 30 (93.75)  | 164 (91.11) | Reference                | Reference                | 1111 (86.80)             | 221 (92.08) | 900 (85.39) | Reference                | Reference                |
| Preterm                                        | 12 (5.69)              | 2 (6.25)    | 16 (8.89)   | 1.00 (0.21-4.84)         | 1.28 (0.55-2.98)         | 169 (13.20)              | 19 (7.92)   | 154 (14.61) | 0.60 (0.37-1.00)         | 1.21 (0.94-1.54)         |
| <b>Mode of delivery</b>                        |                        |             |             |                          |                          |                          |             |             |                          |                          |
| Vaginal                                        | 103 (48.82)            | 15 (46.88)  | 58 (32.22)  | Reference                | Reference                | 562 (43.91)              | 94 (39.17)  | 422 (40.04) | Reference                | Reference                |
| Cesarean section                               | 108 (51.18)            | 17 (53.13)  | 122 (67.78) | 1.03 (0.48-2.21)         | 2.05 (1.33-3.15)         | 718 (56.09)              | 146 (60.83) | 632 (59.96) | 1.16 (0.87-1.54)         | 1.14 (0.96-1.35)         |

FET, frozen embryo transfer; NC, natural cycles; OS, ovarian stimulation; HRT, hormonal replacement therapy; aOR, adjusted odds ratio; CI, confidence interval.

aOR was adjusted for age at oocyte retrieval, age at embryo transfer, BMI and cause of infertility.

**Table S2 Outcomes of singletons born following FET with different endometrial preparation protocols stratified according to the number of embryo transfer**

|                                        | Single embryo transfer |            |             |                          |                          | Double embryo transfer |             |             |                          |                          |
|----------------------------------------|------------------------|------------|-------------|--------------------------|--------------------------|------------------------|-------------|-------------|--------------------------|--------------------------|
|                                        | NC                     | OS         | HRT         | aOR (95%CI) <sup>a</sup> | aOR (95%CI) <sup>a</sup> | NC                     | OS          | HRT         | aOR (95%CI) <sup>a</sup> | aOR (95%CI) <sup>a</sup> |
|                                        | (N=211)                | (N=32)     | (N=180)     |                          |                          | (N=1280)               | (N=240)     | (N=1054)    |                          |                          |
|                                        | No. (%)                | No. (%)    | No. (%)     | OS vs.NC                 | HRT vs. NC               | No. (%)                | No. (%)     | No. (%)     | OS vs.NC                 | HRT vs. NC               |
| <b>Gender</b>                          |                        |            |             |                          |                          |                        |             |             |                          |                          |
| Male                                   | 101 (47.87)            | 18 (56.25) | 86 (47.78)  | Reference                | Reference                | 632 (49.38)            | 131 (54.58) | 539 (51.14) | Reference                | Reference                |
| Female                                 | 110 (52.13)            | 14 (43.75) | 94 (52.22)  | 0.74 (0.34-1.61)         | 0.97 (0.64-1.47)         | 648 (50.63)            | 109 (45.42) | 515 (48.86) | 0.82 (0.62-1.08)         | 0.93 (0.78-1.10)         |
| <b>Birthweight</b>                     |                        |            |             |                          |                          |                        |             |             |                          |                          |
| <2500 g                                | 4 (1.90)               | 2 (6.25)   | 8 (4.44)    | 3.61 (0.60-21.50)        | 3.30 (0.43-14.78)        | 64 (5.00)              | 21 (8.75)   | 104 (9.87)  | 1.61 (0.94-2.76)         | 1.88 (1.33-2.65)         |
| 2500-4000g                             | 191 (90.52)            | 26 (81.25) | 158 (87.78) | Reference                | Reference                | 1128 (88.13)           | 200 (83.33) | 873 (82.83) | Reference                | Reference                |
| >4000 g                                | 16 (7.58)              | 4 (12.50)  | 14 (7.78)   | 1.80 (0.54-6.05)         | 1.00 (0.45-2.24)         | 88 (6.88)              | 19 (7.92)   | 77 (7.31)   | 1.09 (0.65-1.85)         | 1.01 (0.73-1.41)         |
| <b>Birthweight for gestational age</b> |                        |            |             |                          |                          |                        |             |             |                          |                          |
| SGA                                    | 16 (7.58)              | 7 (21.88)  | 13 (7.22)   | 4.05 (1.43-12.59)        | 0.95 (0.44-2.09)         | 88 (6.88)              | 25 (10.42)  | 113 (10.72) | 1.35 (1.01-2.19)         | 1.22 (1.08-1.97)         |
| AGA                                    | 152 (72.04)            | 19 (59.38) | 136 (75.56) | Reference                | Reference                | 885 (69.14)            | 170 (70.83) | 721 (68.41) | Reference                | Reference                |
| LGA                                    | 43 (20.38)             | 6 (18.75)  | 31 (17.22)  | 1.22 (0.45-3.32)         | 0.77 (0.45-1.32)         | 307 (23.98)            | 45 (18.75)  | 220 (20.87) | 0.71 (0.49-1.01)         | 0.82 (0.66-1.01)         |

NC, natural cycles; OS, ovarian stimulation; HRT, hormonal replacement therapy; aOR, adjusted odds ratio; CI, confidence interval; NA, not accessible; AGA, appropriate for gestational age; SGA, small for gestational age; LGA, large for gestational age.

<sup>a</sup>aOR was adjusted for age at oocyte retrieval, age at embryo transfer, BMI, cause of infertility, gestational hypertensive disorder, intrahepatic cholestasis of pregnancy, and meconium staining of the amniotic fluid.

**Table S3 Interactive effect of number of FET with different endometrial preparation protocols on pregnancy-related complications of singleton deliveries following FET**

|                                                | OS vs. NC                |                          | HRT vs. NC               |                          |
|------------------------------------------------|--------------------------|--------------------------|--------------------------|--------------------------|
|                                                | aOR (95%CI) <sup>a</sup> | <i>P</i> for interaction | aOR (95%CI) <sup>a</sup> | <i>P</i> for interaction |
| <b>Gestational diabetes mellitus</b>           |                          |                          |                          |                          |
| No                                             | Reference                |                          | Reference                |                          |
| Yes                                            | 1.22 (0.99-1.50)         | 0.057                    | 1.04 (0.91-1.19)         | 0.582                    |
| <b>Hypertensive disorder</b>                   |                          |                          |                          |                          |
| No                                             | Reference                |                          | Reference                |                          |
| Gestational hypertension                       | 1.20 (0.93-1.56)         | 0.159                    | 1.16 (0.98-1.36)         | 0.081                    |
| Preeclampsia                                   | 1.58 (1.28-1.95)         | <0.001                   | 1.45 (1.26-1.67)         | <0.001                   |
| <b>Intrahepatic cholestasis of pregnancy</b>   |                          |                          |                          |                          |
| No                                             | Reference                |                          | Reference                |                          |
| Yes                                            | 1.55 (1.17-2.04)         | 0.002                    | 1.42 (1.19-1.71)         | <0.001                   |
| <b>Meconium staining of the amniotic fluid</b> |                          |                          |                          |                          |
| No                                             | Reference                |                          | Reference                |                          |
| Yes                                            | 1.11 (0.92-1.33)         | 0.271                    | 1.15 (1.04-1.29)         | 0.009                    |
| <b>Preterm birth</b>                           |                          |                          |                          |                          |
| No                                             | Reference                |                          | Reference                |                          |
| Preterm                                        | 0.80 (0.62-1.03)         | 0.079                    | 1.13 (0.99-1.27)         | 0.053                    |
| <b>Mode of delivery</b>                        |                          |                          |                          |                          |
| Vaginal                                        | Reference                |                          | Reference                |                          |
| Cesarean section                               | 1.08 (0.94-1.24)         | 0.302                    | 1.09 (1.00-1.19)         | 0.091                    |

FET, frozen embryo transfer; NC, natural cycles; OS, ovarian stimulation; HRT, hormonal replacement therapy; aOR, adjusted odds ratio; CI, confidence interval.

a aOR was adjusted for age at oocyte retrieval, age at embryo transfer, BMI and cause of infertility.

**Table S4 Interactive effect of number of FET with different endometrial preparation protocols on outcomes of singletons born following FET**

|                                        | OS vs. NC                |                          | HRT vs. NC               |                          |
|----------------------------------------|--------------------------|--------------------------|--------------------------|--------------------------|
|                                        | aOR (95%CI) <sup>a</sup> | <i>P</i> for interaction | aOR (95%CI) <sup>a</sup> | <i>P</i> for interaction |
| <b>Gender</b>                          |                          |                          |                          |                          |
| Male                                   | Reference                |                          | Reference                |                          |
| Female                                 | 0.89 (0.78-1.02)         | 0.105                    | 0.96 (0.88-1.04)         | 0.317                    |
| <b>Birthweight</b>                     |                          |                          |                          |                          |
| <2500 g                                | 1.32 (1.01-1.73)         | 0.038                    | 1.45 (1.22-1.72)         | <0.001                   |
| 2500-4000g                             | Reference                |                          | Reference                |                          |
| >4000 g                                | 1.07 (0.83-1.37)         | 0.619                    | 0.99 (0.85-1.17)         | 0.947                    |
| <b>Birthweight for gestational age</b> |                          |                          |                          |                          |
| SGA                                    | 1.19 (0.73-1.04)         | 0.080                    | 1.15 (1.00-1.33)         | 0.012                    |
| AGA                                    | Reference                |                          | Reference                |                          |
| LGA                                    | 0.87 (0.73-1.04)         | 0.093                    | 0.92 (0.83-1.02)         | 0.085                    |

FET, frozen embryo transfer; NC, natural cycles; OS, ovarian stimulation; HRT, hormonal replacement therapy; aOR, adjusted odds ratio; CI, confidence interval; NA, not accessible; AGA, appropriate for gestational age; SGA, small for gestational age; LGA, large for gestational age.

<sup>a</sup> aOR was adjusted for age at oocyte retrieval, age at embryo transfer, BMI, cause of infertility, gestational hypertensive disorder, intrahepatic cholestasis of pregnancy, and meconium staining of the amniotic fluid.
